# Supplementary material for: Benchmarking High-Resolution, Hydrologic Performance of Long-Term Retrospectives in the United States
Source: Copernicus journal article supplement (doi:10.5194/hess-2022-276), 2022-08-09
Supplement: Supplementary file 1 [file hess-2022-276-supplement.pdf]

# Supplemental Material for: Benchmarking High-Resolution, Hydrologic Performance of Long-Term Retrospectives in the United States

Erin Towler<sup>1</sup>, Sydney S. Foks<sup>2</sup>, Aubrey L. Dugger<sup>1</sup>, Jesse E. Dickinson<sup>3</sup>, Hedef I. Essaid<sup>4</sup>, David Gochis<sup>1</sup>,  
5 Roland J. Viger<sup>2</sup>, and Yongxin Zhang<sup>1</sup>

<sup>1</sup>National Center for Atmospheric Research (NCAR), Boulder, CO, USA

<sup>2</sup>U.S. Geological Survey (USGS), Lakewood, CO, USA

<sup>3</sup>U.S. Geological Survey, Arizona Water Science Center, Tucson, AZ, USA

<sup>4</sup>U.S. Geological Survey, Moffett Field, CA, USA

10

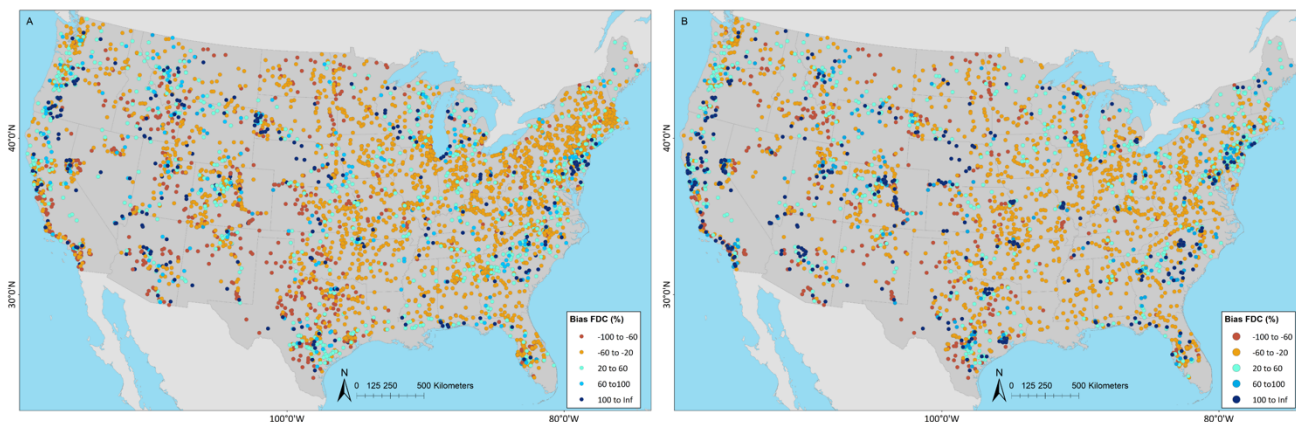

Supplemental Figure 1. Percent bias of midsegment of flow duration curve (PBIAS\_FDC) maps for National Water Model v2.1 (NWMv2.1) (left; A) and National Hydrologic Model v1.0 (NHMv1.0) (right; B), where PBIAS\_FDC >20% or <-20%. Cooler colors are where model is overestimating midsegment slope, and warmer colors are where model is underestimating midsegment slope.

15

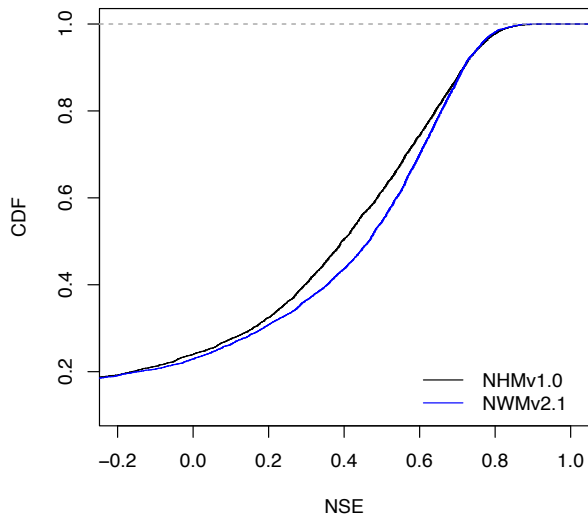

20 **Supplement Figure 2. Cumulative density functions (CDFs) for model Nash-Sutcliffe efficiency (NSE) based on daily streamflow at U.S. Geological Survey (USGS) gages for National Water Model v2.1 (NWMv2.1) and National Hydrologic Model v1.0 (NHMv1.0).**

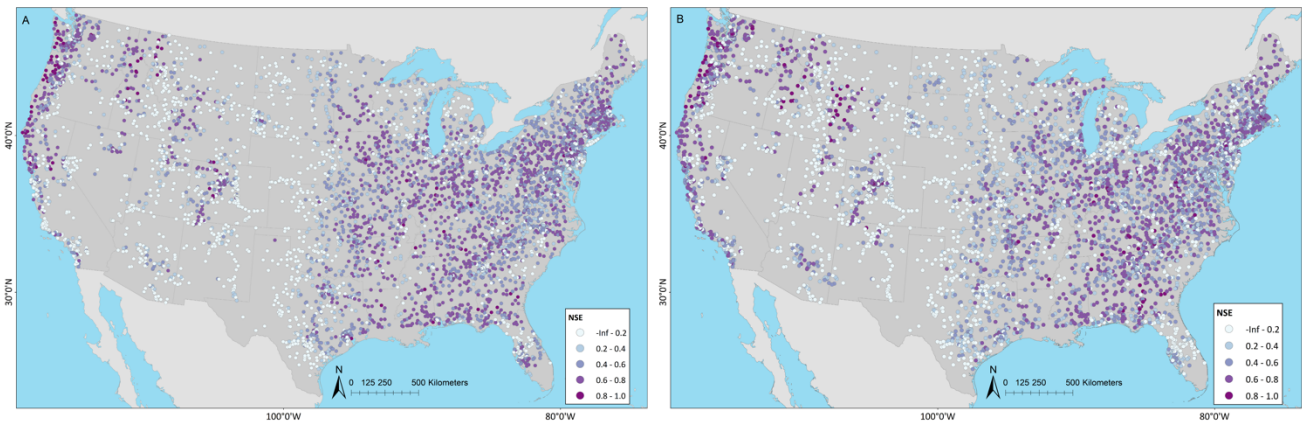

25 **Supplement Figure 3. Nash-Sutcliffe efficiency (NSE) based on National Water Model v2.1 (NWMv2.1) (left, A) and National Hydrologic Model v1.0 (NHMv1.0) (right, B) daily streamflow at U.S. Geological Survey (USGS) gages.**

30 Supplemental Table 1. For each hydrologic model application, number (percent) of sites in PBIAS\_HF category by region; bold italic indicates maximum number (percent) of sites by CONUS, bold indicates maximum number (percent) of sites in each category across regions. PBIAS\_HF = percent bias high flow; CONUS = conterminous United States; NHMv1.0=National Hydrologic Model v1.0; NWMv2.1 = National Water Model v2.1.

|         | PBIAS_HF   | CONUS             | Region           |                  |           |                  |
|---------|------------|-------------------|------------------|------------------|-----------|------------------|
|         |            |                   | West             | Central          | Southeast | Northeast        |
| NHMv1.0 | (-100,-60] | 1046 (19%)        | 217 (21%)        | <b>415 (40%)</b> | 307 (29%) | 107 (10%)        |
|         | (-60,-20]  | <b>2640 (49%)</b> | 562 (21%)        | 676 (26%)        | 675 (26%) | <b>727 (28%)</b> |
|         | (-20,20]   | 1126 (21%)        | <b>379 (34%)</b> | 234 (21%)        | 184 (16%) | 329 (29%)        |
|         | (20,60]    | 251 (5%)          | <b>133 (53%)</b> | 57 (23%)         | 25 (10%)  | 36 (14%)         |
|         | (60,100]   | 117 (2%)          | <b>78 (67%)</b>  | 21 (18%)         | 9 (8%)    | 9 (8%)           |
|         | (100, Inf] | 210 (4%)          | <b>141 (67%)</b> | 47 (22%)         | 12 (6%)   | 10 (5%)          |
| NWMv2.1 | (-100,-60] | 573 (11%)         | 102 (18%)        | <b>209 (36%)</b> | 142 (25%) | 120 (21%)        |
|         | (-60,-20]  | <b>2630 (49%)</b> | 420 (16%)        | 716 (27%)        | 654 (25%) | <b>840 (32%)</b> |
|         | (-20,20]   | 1408 (26%)        | <b>548 (39%)</b> | 325 (23%)        | 312 (22%) | 223 (16%)        |
|         | (20,60]    | 384 (7%)          | <b>202 (53%)</b> | 87 (23%)         | 68 (18%)  | 27 (7%)          |
|         | (60,100]   | 146 (3%)          | <b>90 (62%)</b>  | 34 (23%)         | 17 (12%)  | 5 (3%)           |
|         | (100, Inf] | 249 (5%)          | <b>148 (59%)</b> | 79 (32%)         | 19 (8%)   | 3 (1%)           |

35

Supplemental Table 2. For each hydrologic model application, number (percent) of sites in PBIAS\_LF category by region; bold italic indicates maximum number (percent) of sites by CONUS, bold indicates maximum number (percent) of sites in each category across regions. PBIAS\_LF = percent bias low flow; CONUS = conterminous United States; NHMv1.0=National Hydrologic Model v1.0; NWMv2.1 = National Water Model v2.1.

|         | PBIAS_LF    | CONUS             | Region           |                  |           |                  |
|---------|-------------|-------------------|------------------|------------------|-----------|------------------|
|         |             |                   | West             | Central          | Southeast | Northeast        |
| NHMv1.0 | (-Inf,-100] | 1169 (22%)        | <b>470 (40%)</b> | 257 (22%)        | 233 (20%) | 209 (18%)        |
|         | (-100,-60]  | 450 (8%)          | 133 (30%)        | 67 (15%)         | 104 (23%) | <b>146 (32%)</b> |
|         | (-60,-20]   | 715 (13%)         | 173 (24%)        | 134 (19%)        | 178 (25%) | <b>230 (32%)</b> |
|         | (-20,20]    | 1041 (19%)        | 233 (22%)        | 271 (26%)        | 220 (21%) | <b>317 (30%)</b> |
|         | (20,60]     | <b>1287 (24%)</b> | 289 (22%)        | <b>412 (32%)</b> | 319 (25%) | 267 (21%)        |
|         | (60,100]    | 722 (13%)         | 207 (29%)        | <b>309 (43%)</b> | 158 (22%) | 48 (7%)          |
|         | NA          | 6 (0.1%)          | 5 (83%)          | 0 (0%)           | 0 (0%)    | 1 (17%)          |
| NWMv2.1 | (-Inf,-100] | 504 (9%)          | <b>252 (50%)</b> | 152 (30%)        | 55 (11%)  | 45 (9%)          |
|         | (-100,-60]  | 215 (4%)          | <b>86 (40%)</b>  | 40 (19%)         | 47 (22%)  | 42 (20%)         |
|         | (-60,-20]   | 479 (9%)          | 145 (30%)        | 90 (19%)         | 74 (15%)  | <b>170 (35%)</b> |
|         | (-20,20]    | 988 (18%)         | 262 (27%)        | 204 (21%)        | 180 (18%) | <b>342 (35%)</b> |
|         | (20,60]     | 1489 (28%)        | 335 (22%)        | 378 (25%)        | 379 (25%) | <b>397 (27%)</b> |
|         | (60,100]    | <b>1709 (32%)</b> | 425 (25%)        | <b>586 (34%)</b> | 477 (28%) | 221 (13%)        |
|         | NA          | 6 (0.1%)          | 5 (83%)          | 0 (0%)           | 0 (0%)    | 1 (17%)          |

50

Supplemental Table 3. For each hydrologic model application, number (percent) of sites in Nash-Sutcliffe efficiency (NSE) category by region; bold italic indicates maximum number (percent) of sites by CONUS, bold indicates maximum number (percent) of sites in each category across regions. CONUS = conterminous United States; NHMv1.0=National Hydrologic Model v1.0; NWMv2.1 = National Water Model v2.1.

|         | NSE     | CONUS             | Region           |                  |           |                  |
|---------|---------|-------------------|------------------|------------------|-----------|------------------|
|         |         |                   | West             | Central          | Southeast | Northeast        |
| NHMv1.0 | <0.2    | <b>1750 (32%)</b> | <b>741 (42%)</b> | 553 (32%)        | 267 (15%) | 189 (11%)        |
|         | 0.2-0.4 | 976 (18%)         | 162 (17%)        | <b>347 (36%)</b> | 290 (30%) | 177 (18%)        |
|         | 0.4-0.6 | 1285 (24%)        | 211 (16%)        | 332 (26%)        | 356 (28%) | <b>386 (30%)</b> |
|         | 0.6-1.0 | 1379 (26%)        | 396 (29%)        | 218 (16%)        | 299 (22%) | <b>466 (34%)</b> |
| NWMv2.1 | <0.2    | <b>1660 (31%)</b> | <b>759 (46%)</b> | 553 (33%)        | 250 (15%) | 98 (6%)          |
|         | 0.2-0.4 | 698 (13%)         | 162 (23%)        | <b>227 (33%)</b> | 169 (24%) | 140 (20%)        |
|         | 0.4-0.6 | 1421 (26%)        | 221 (16%)        | 334 (24%)        | 401 (28%) | <b>465 (33%)</b> |
|         | 0.6-1.0 | 1611 (30%)        | 368 (23%)        | 336 (21%)        | 392 (24%) | <b>515 (32%)</b> |

55

Supplemental Table 4. For each hydrologic model application, number (percent) of sites in logNSE category by region; bold italic indicates maximum number (percent) of sites by CONUS, bold indicates maximum number (percent) of sites in each category across regions. NSE = Nash-Sutcliffe efficiency; CONUS = conterminous United States; NHMv1.0=National Hydrologic Model v1.0; NWMv2.1 = National Water Model v2.1.

|         | logNSE  | CONUS             | Region           |                  |                  |                  |
|---------|---------|-------------------|------------------|------------------|------------------|------------------|
|         |         |                   | West             | Central          | Southeast        | Northeast        |
| NHMv1.0 | <0.2    | <b>2265 (42%)</b> | <b>850 (38%)</b> | 684 (30%)        | 455 (20%)        | 276 (12%)        |
|         | 0.2-0.4 | 603 (11%)         | 139 (23%)        | <b>205 (34%)</b> | 139 (23%)        | 120 (20%)        |
|         | 0.4-0.6 | 1009 (19%)        | 185 (18%)        | <b>312 (31%)</b> | 247 (24%)        | 265 (26%)        |
|         | 0.6-1.0 | 1513 (28%)        | 336 (22%)        | 249 (16%)        | 371 (25%)        | <b>557 (37%)</b> |
| NWMv2.1 | <0.2    | <b>2078 (39%)</b> | <b>850 (41%)</b> | 681 (33%)        | 410 (20%)        | 137 (7%)         |
|         | 0.2-0.4 | 487 (9%)          | 122 (25%)        | <b>150 (31%)</b> | 122 (25%)        | 93 (19%)         |
|         | 0.4-0.6 | 893 (17%)         | 168 (19%)        | 232 (26%)        | <b>277 (31%)</b> | 216 (24%)        |
|         | 0.6-1.0 | 1932 (36%)        | 370 (19%)        | 387 (20%)        | 403 (21%)        | <b>772 (40%)</b> |

60

65
